# Supplementary material
Source: publisher site journal article supplement (https://static.cambridge.org/content/id/urn:cambridge.org:id:article:S0008347X20000255/resource/name/S0008347X20000255supp001.pdf)
Supplement: Supplementary file 1 [file S0008347X20000255supp001.pdf]

**Supplementary Table 1.** Gut contents of eight rainbow trout (*Oncorhynchus mykiss*) identified visually (Morphological ID), by DNA sequencing of individual heads (barcode sequence ID), or DNA sequencing of homogenised gut contents using next generation sequences (NGS ID). The lowest taxonomic classification determined for specimens within the different orders is listed for each method.

| ORDER                | FAMILY           | Morphological ID        | Barcode ID                         | NGS ID                                 |
|----------------------|------------------|-------------------------|------------------------------------|----------------------------------------|
| <b>EPHEMEROPTERA</b> |                  | EPHEMEROPTERA           |                                    |                                        |
|                      | LEPTOPHLEBIIDAE  | <i>Paraleptophlebia</i> | <i>Paraleptophlebia heteronea</i>  | <i>Paraleptophlebia heteronea</i>      |
|                      | LEPTOPHLEBIIDAE  |                         | <i>Paraleptophlebia memorialis</i> | <i>Paraleptophlebia memorialis</i>     |
|                      | LEPTOPHLEBIIDAE  |                         |                                    | <i>Leptophlebia nebulosa</i>           |
|                      | LEPTOPHLEBIIDAE  |                         |                                    | <i>Leptophlebia cupida</i>             |
|                      | HEPTAGENIIDAE    | HEPTAGENIIDAE           | <i>Cinygmula</i>                   |                                        |
|                      | HEPTAGENIIDAE    |                         |                                    | <i>Cinygmula mimus</i>                 |
|                      | HEPTAGENIIDAE    |                         |                                    | <i>Rhithrogena</i>                     |
|                      | HEPTAGENIIDAE    |                         |                                    | <i>Epeorus albertae</i>                |
|                      | BAETIDAE         |                         | <i>Dipheter hageni</i>             | <i>Dipheter hageni</i>                 |
|                      | BAETIDAE         |                         | <i>Baetis tricaudatus</i>          |                                        |
|                      | AMELETIDAE       |                         | <i>Ameletus</i>                    | <i>Ameletus</i>                        |
|                      | AMELETIDAE       |                         |                                    | <i>Ameletus validus</i>                |
|                      | EPHEMERELLIDAE   |                         |                                    | EPHEMERELLIDAE                         |
|                      | EPHEMERELLIDAE   |                         |                                    | <i>Ephemerella dorothea infrequens</i> |
|                      | EPHEMERELLIDAE   |                         |                                    | <i>Drunella grandis</i>                |
| <b>PLECOPTERA</b>    |                  | PLECOPTERA              |                                    |                                        |
|                      | PERLODIDAE       |                         | <i>Isoperla fulva</i>              | <i>Isoperla fulva</i>                  |
|                      | PERLODIDAE       |                         |                                    | <i>Skwala compacta</i>                 |
|                      | PERLODIDAE       |                         | <i>Skwala americana</i>            | <i>Skwala americana</i>                |
|                      | NEMOURIDAE       |                         | <i>Zapada</i>                      | <i>Zapada</i>                          |
|                      | NEMOURIDAE       |                         | <i>Zapada cinctipes</i>            | <i>Zapada cinctipes</i>                |
|                      | CHLOROPERLIDAE   |                         |                                    | <i>Triznaka signata</i>                |
|                      | PERLIDAE         |                         |                                    | <i>Hesperoperla</i>                    |
|                      | PERLIDAE         |                         |                                    | <i>Hesperoperla pacifica</i>           |
| <b>TRICHOPTERA</b>   |                  | TRICHOPTERA             | TRICHOPTERA                        |                                        |
|                      | LEPIDOSTOMATIDAE |                         | <i>Lepidostoma</i>                 | <i>Lepidostoma</i>                     |
|                      | LEPIDOSTOMATIDAE |                         | <i>Lepidostoma rayneri</i>         |                                        |
|                      | LEPIDOSTOMATIDAE |                         | <i>Lepidostoma pluviale</i>        |                                        |

| ORDER         | FAMILY          | Morphological ID         | Barcode ID                     | NGS ID                           |
|---------------|-----------------|--------------------------|--------------------------------|----------------------------------|
| TRICHOPTERA   | HYDROPSYCHIDAE  | HYDROPSYCHIDAE           | <i>Hydropsyche oslari</i>      |                                  |
|               | GLOSSOSOMATIDAE |                          | <i>Glossosoma alascense</i>    |                                  |
|               | RHYACOPHILIDAE  |                          | <i>Rhyacophila brunnea</i>     |                                  |
| DIPTERA       |                 | DIPTERA                  |                                | DIPTERA                          |
|               | CERATOPOGONIDAE | CERATOPOGONIDAE          |                                |                                  |
|               | CHIRONOMIDAE    | CHIRONOMIDAE             | CHIRONOMIDAE                   | CHIRONOMIDAE                     |
|               | CHIRONOMIDAE    |                          |                                | CHIRONOMINAE                     |
|               | CHIRONOMIDAE    |                          | <i>Orthocladius</i>            | <i>Orthocladius</i>              |
|               | CHIRONOMIDAE    |                          | <i>Cricotopus</i>              | <i>Cricotopus</i>                |
|               | CHIRONOMIDAE    |                          |                                | <i>Cricotopus bicinctus</i>      |
|               | CHIRONOMIDAE    |                          | <i>Synorthocladius</i>         | <i>Synorthocladius</i>           |
|               | CHIRONOMIDAE    |                          | <i>Psectrocladius</i>          | <i>Psectrocladius</i>            |
|               | CHIRONOMIDAE    |                          |                                | <i>Thienemanniella</i>           |
|               | CHIRONOMIDAE    |                          | <i>Thienemanniella xena</i>    | <i>Thienemanniella xena</i>      |
|               | CHIRONOMIDAE    |                          |                                | <i>Parakiefferiella</i>          |
|               | CHIRONOMIDAE    |                          |                                | <i>Eukiefferiella</i>            |
|               | CHIRONOMIDAE    |                          | <i>Procladius</i>              | <i>Procladius</i>                |
|               | CHIRONOMIDAE    |                          | <i>Procladius denticulatus</i> |                                  |
|               | CHIRONOMIDAE    |                          | <i>Procladius culiciformis</i> |                                  |
|               | CHIRONOMIDAE    |                          |                                | <i>Procladius signatus</i>       |
|               | CHIRONOMIDAE    |                          | <i>Tanytarsus</i>              | <i>Tanytarsus</i>                |
|               | CHIRONOMIDAE    |                          |                                | <i>Tanytarsus buckleyi</i>       |
|               | CHIRONOMIDAE    |                          |                                | <i>Tanytarsus lestagei</i>       |
|               | CHIRONOMIDAE    |                          |                                | <i>Heterotanytarsus apicalis</i> |
|               | CHIRONOMIDAE    |                          |                                | <i>Micropsectra</i>              |
|               | CHIRONOMIDAE    |                          |                                | <i>Micropsectra subletteorum</i> |
|               | CHIRONOMIDAE    |                          |                                | <i>Paracladopelma</i>            |
|               | CHIRONOMIDAE    |                          |                                | <i>Potthastia</i>                |
|               | CHIRONOMIDAE    |                          | <i>Phaenopsectra</i>           |                                  |
|               | CHIRONOMIDAE    |                          | <i>Conchapelopia pallens</i>   |                                  |
| SIMULIIDAE    |                 | <i>Simulium</i>          |                                |                                  |
| SIMULIIDAE    |                 |                          | <i>Simulium malyschevi</i>     |                                  |
| SIMULIIDAE    |                 | <i>Simulium arcticum</i> |                                |                                  |
| BIBIONIDAE    |                 | <i>Bibio longipes</i>    | <i>Bibio longipes</i>          |                                  |
| CECIDOMYIIDAE |                 | <i>Cecidomyiidae</i>     | <i>Cecidomyiidae</i>           |                                  |

| ORDER              | FAMILY         | Morphological ID   | Barcode ID                     | NGS ID                         |
|--------------------|----------------|--------------------|--------------------------------|--------------------------------|
| <b>DIPTERA</b>     | PSYCHODIDAE    |                    | <i>Psychoda</i>                |                                |
|                    | PSYCHODIDAE    |                    |                                | <i>Psychoda phalaenoides</i>   |
|                    | MUSCIDAE       |                    |                                | <i>Spilogona suspecta</i>      |
|                    | MYCETOPHILIDAE |                    | <i>Hadroneura</i>              |                                |
| <b>HEMIPTERA</b>   |                | <b>HEMIPTERA</b>   |                                |                                |
|                    | APHIDIDAE      |                    | <i>Aphis</i>                   | <i>Aphis</i>                   |
|                    | APHIDIDAE      |                    | <i>Aphis salicariae</i>        |                                |
|                    | APHIDIDAE      |                    | <i>Rhopalosiphum padi</i>      | <i>Rhopalosiphum padi</i>      |
|                    | APHIDIDAE      |                    | <i>Rhopalosiphum nymphaeae</i> |                                |
|                    | APHIDIDAE      |                    |                                | <i>Pterocomma salicis</i>      |
|                    | APHIDIDAE      |                    |                                | <i>Euceraphis gillettei</i>    |
|                    | CICADELLIDAE   |                    | <i>Idiocerus delongi</i>       | <i>Idiocerus delongi</i>       |
|                    | CICADELLIDAE   |                    | <i>Empoasca</i>                |                                |
|                    | TRIOZIDAE      |                    |                                | <i>Triozidae</i>               |
|                    | ANTHOCORIDAE   |                    |                                | <i>Anthocoris antevolens</i>   |
| <b>HYMENOPTERA</b> |                | <b>HYMENOPTERA</b> |                                |                                |
|                    | ICHNEUMONIDAE  |                    | <i>Aperileptus albipalpus</i>  | <i>Aperileptus albipalpus</i>  |
| <b>HOMOPTERA</b>   |                | <b>HOMOPTERA</b>   |                                |                                |
| <b>COLEOPTERA</b>  |                | <b>COLEOPTERA</b>  |                                |                                |
|                    | OEDEMERIDAE    |                    |                                | <i>Chrysanthia viridissima</i> |
| <b>NEUROPTERA</b>  | HEMEROBIDAE    |                    | <i>Micromus montanus</i>       |                                |
|                    | HEMEROBIDAE    |                    |                                | <i>Hemerobius humulinus</i>    |
| <b>LEPIDOPTERA</b> | NOCTUIDAE      |                    |                                | <i>Dargida procinctus</i>      |
| <b>ARANEAE</b>     |                | <b>ARANEAE</b>     |                                |                                |
|                    | PHALANGIIDAE   |                    | <i>Oligolophus tridens</i>     |                                |
| <b>HAPLOTAXIDA</b> |                | <b>HAPLOTAXIDA</b> |                                |                                |
|                    | LUMBRICIDAE    |                    | <i>Lumbricus terrestris</i>    | <i>Lumbricus terrestris</i>    |
|                    | TUBIFICIDAE    |                    |                                | <i>Chaetogaster diaphanus</i>  |

**Supplementary Table 2.** Gut contents of eight prickly sculpin (*Cottus asper*) identified visually (Morphological ID), by DNA sequencing of individual heads (barcode sequence ID), or DNA sequencing of homogenised gut contents using next generation sequences (NGS ID). The lowest taxonomic classification determined for specimens within the different orders is listed for each method.

| ORDER                | FAMILY            | Morphological ID             | Barcode ID                         | NGS ID                             |
|----------------------|-------------------|------------------------------|------------------------------------|------------------------------------|
| <b>EPHEMEROPTERA</b> |                   | EPHEMEROPTERA                |                                    |                                    |
|                      | LEPTOPHLEBIIDAE   | <i>Paraleptophlebia</i>      | <i>Paraleptophlebia heteronea</i>  | <i>Paraleptophlebia heteronea</i>  |
|                      | LEPTOPHLEBIIDAE   |                              | <i>Paraleptophlebia memorialis</i> | <i>Paraleptophlebia memorialis</i> |
|                      | LEPTOPHLEBIIDAE   |                              |                                    | <i>Paraleptophlebia debilis</i>    |
|                      | LEPTOPHLEBIIDAE   |                              |                                    | <i>Leptophlebia nebulosa</i>       |
|                      | HEPTAGENIIDAE     | HEPTAGENIIDAE                |                                    | <i>Cinygmula mimus</i>             |
|                      | HEPTAGENIIDAE     |                              |                                    | <i>Epeorus deceptivus</i>          |
|                      | HEPTAGENIIDAE     |                              |                                    | <i>Epeorus albertae</i>            |
|                      | EPHEMERELLIDAE    | <i>Drunella</i>              |                                    | <i>Drunella grandis</i>            |
|                      | EPHEMERELLIDAE    |                              |                                    | <i>Dipheter hageni</i>             |
|                      | EPHEMERELLIDAE    |                              |                                    | <i>Ephemerella</i>                 |
|                      | AMELETIDAE        |                              |                                    | <i>Ameletus vernalis</i>           |
|                      | AMELETIDAE        |                              |                                    | <i>Ameletus validus</i>            |
| BAETIDAE             |                   |                              | <i>Acentrella turbida</i>          |                                    |
| <b>PLECOPTERA</b>    |                   | PLECOPTERA                   |                                    |                                    |
|                      | CAPNIIDAE         |                              | <i>Utacapnia columbiana</i>        | <i>Utacapnia columbiana</i>        |
|                      | CAPNIIDAE         |                              |                                    | <i>Capnia coloradensis</i>         |
|                      | PERLODIDAE        |                              | <i>Skwala americana</i>            |                                    |
|                      | PERLODIDAE        |                              |                                    | <i>Skwala compacta</i>             |
|                      | PERLODIDAE        |                              |                                    | <i>Isoperla fulva</i>              |
|                      | PERLODIDAE        |                              |                                    | <i>Kogotus</i>                     |
|                      | CHLOROPERLIDAE    |                              |                                    | <i>Triznaka signata</i>            |
| NEMOURIDAE           |                   |                              | <i>Zapada</i>                      |                                    |
| <b>TRICHOPTERA</b>   |                   | TRICHOPTERA                  |                                    |                                    |
|                      | LEPIDOSTOMATIDAE  |                              | <i>Lepidostoma rayneri</i>         | <i>Lepidostoma</i>                 |
|                      | LEPIDOSTOMATIDAE  |                              | <i>Lepidostoma ormeum</i>          |                                    |
|                      | POLYCENTROPODIDAE |                              | <i>Plectrocnemia variegata</i>     |                                    |
|                      | POLYCENTROPODIDAE |                              |                                    | <i>Polycentropus variegatus</i>    |
| LIMNAPHILIDAE        |                   | <i>Ecclisomyia conspersa</i> | <i>Ecclisomyia conspersa</i>       |                                    |

| ORDER                           | FAMILY          | Morphological ID | Barcode ID                        | NGS ID                           |
|---------------------------------|-----------------|------------------|-----------------------------------|----------------------------------|
| <b>TRICHOPTERA</b>              | GLOSSOSOMATIDAE |                  | <i>Glossosoma alascense</i>       |                                  |
|                                 | LEPTOCERIDAE    |                  | <i>Oecetis disjuncta</i>          |                                  |
|                                 | HYDROPSYCHIDAE  |                  |                                   | HYDROPSYCHE                      |
| <b>DIPTERA</b>                  |                 | DIPTERA          |                                   |                                  |
|                                 | CHIRONOMIDAE    | CHIRONOMIDAE     | CHIRONOMIDAE                      | CHIRONOMIDAE                     |
|                                 | CHIRONOMIDAE    |                  | <i>Synorthocladius semivirens</i> | <i>Synorthocladius</i>           |
|                                 | CHIRONOMIDAE    |                  | <i>Orthocladius</i>               | <i>Orthocladius</i>              |
|                                 | CHIRONOMIDAE    |                  | <i>Tokunagaia tonollii</i>        |                                  |
|                                 | CHIRONOMIDAE    |                  | <i>Cricotopus</i>                 |                                  |
|                                 | CHIRONOMIDAE    |                  |                                   | <i>Tanytarsus</i>                |
|                                 | TIPULIDAE       | TIPULIDAE        | TIPULIDAE                         |                                  |
|                                 | TIPULIDAE       |                  |                                   | <i>Limoniidae</i>                |
|                                 | CULICIDAE       |                  | <i>Anopheles</i>                  |                                  |
|                                 | TACHINIDAE      |                  | <i>Winthemia janzen</i>           |                                  |
| <b>BATRACHO –<br/>SPERMALES</b> |                 |                  |                                   | <i>Batrachospermum</i>           |
|                                 |                 |                  |                                   | <i>Paralemanea annulata</i>      |
| <b>EUSTIGMATALES</b>            |                 |                  |                                   | <i>Nannochloropsis limnetica</i> |
| <b>PYTHIALES</b>                | PYTHIACEAE      |                  |                                   | <i>Pythium</i>                   |
